# Supplementary material for: Probabilistic analysis of system outage in distributed antenna systems with composite channels
Source: Springer Nature journal article supplement (doi:10.1186/1687-1499-2013-147), 2013-05-31

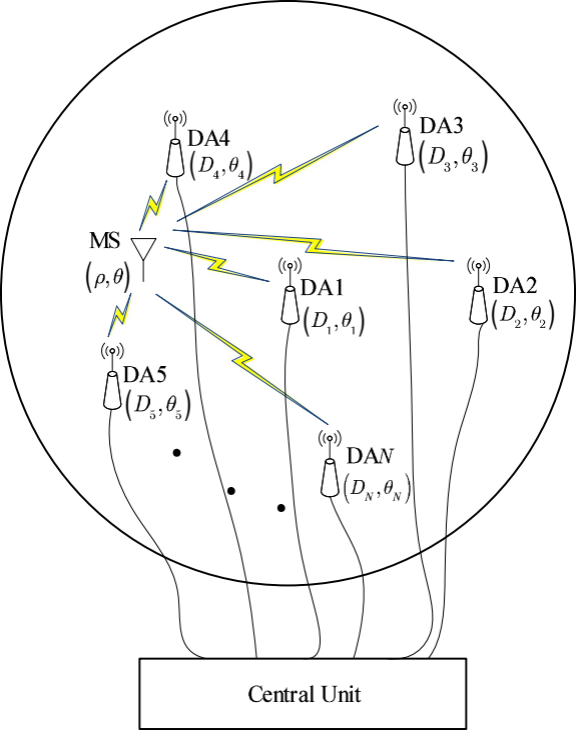

Supplement: 13638_2013_696_MOESM1_ESM.pdf [file 13638_2013_696_MOESM1_ESM.pdf]
